# Supplementary material for: Elucidating the energy storage mechanism of ZnMn2O4 as promising anode for Li-ion batteries
Source: Royal Society of Chemistry journal article supplement (doi:10.1039/c8ta06294c), 2018-01-01
Supplement: c8ta06294c1.pdf [file c8ta06294c1.pdf]

## Supporting information

### Elucidating the Energy Storage Mechanism of $\text{ZnMn}_2\text{O}_4$ as Promising Anode for Li-Ion Batteries

Zijian Zhao<sup>a,\*</sup>, Guiying Tian<sup>a</sup>, Angelina Sarapulova<sup>a</sup>, Vanessa Trouillet<sup>a,b</sup>, Qiang Fu<sup>a</sup>, Udo Geckle<sup>a</sup>, Helmut Ehrenberg<sup>a,c</sup> and Sonia Dsoke<sup>a,c,\*</sup>

<sup>a</sup>Institute for Applied Materials - Energy Storage Systems (IAM - ESS), Karlsruhe Institute of Technology (KIT), Hermann-von-Helmholtz-Platz 1, 76344 Eggenstein-Leopoldshafen, Germany

<sup>b</sup>Karlsruhe Nano Micro Facility (KNMF), Karlsruhe Institute of Technology (KIT), 76344, Eggenstein-Leopoldshafen, Germany

<sup>c</sup>Helmholtz Institute Ulm for Electrochemical Energy Storage (HIU), Helmholtzstraße 11, 89081 Ulm, Germany

---

\* Corresponding authors.

*E-mail address:* sonia.dsoke@kit.edu (S. Dsoke); zijian.zhao2@partner.kit.edu (Z. Zhao)

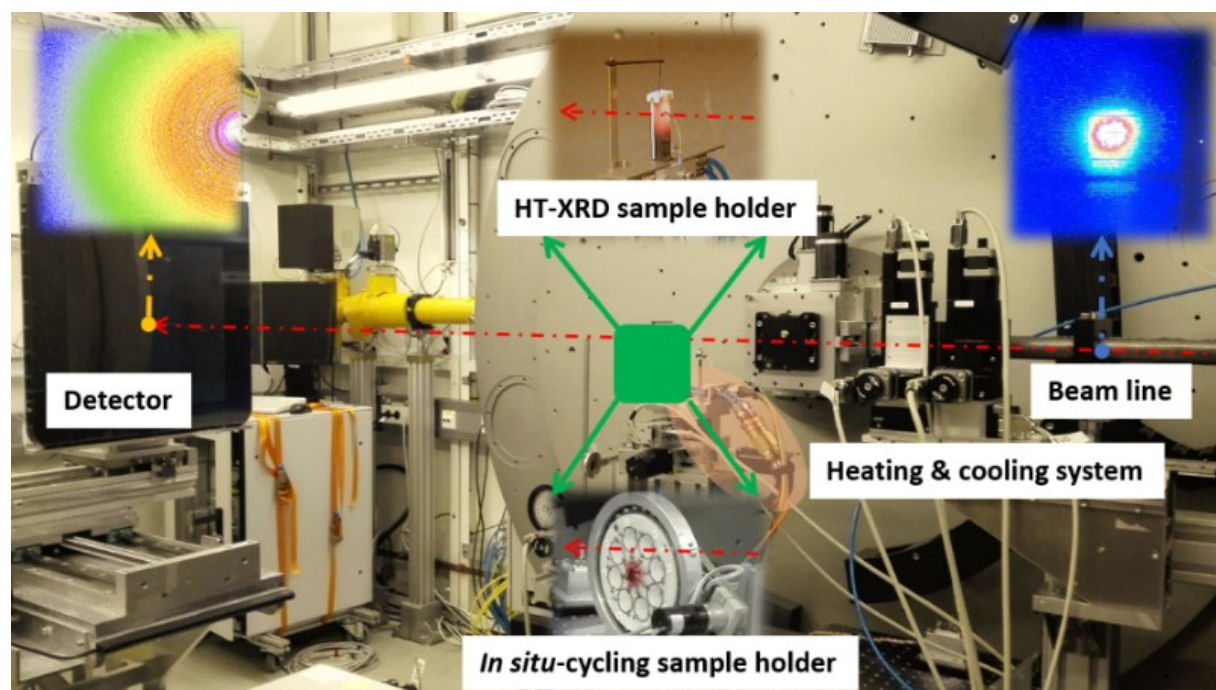

**Fig. S1** Overview of the HT-SXRD and *in situ* SXRD instruments in the P02.1, Petra-III DESY, Hamburg.

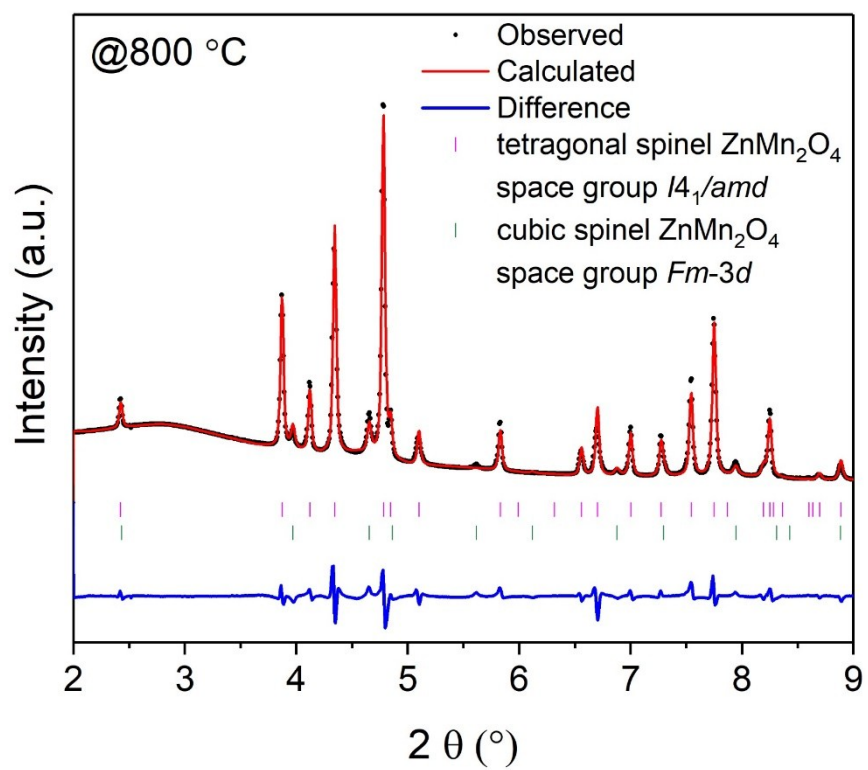

**Fig. S2** The SXR D pattern of the scan at 800 °C in HT-SXR D and the Rietveld refinement result.

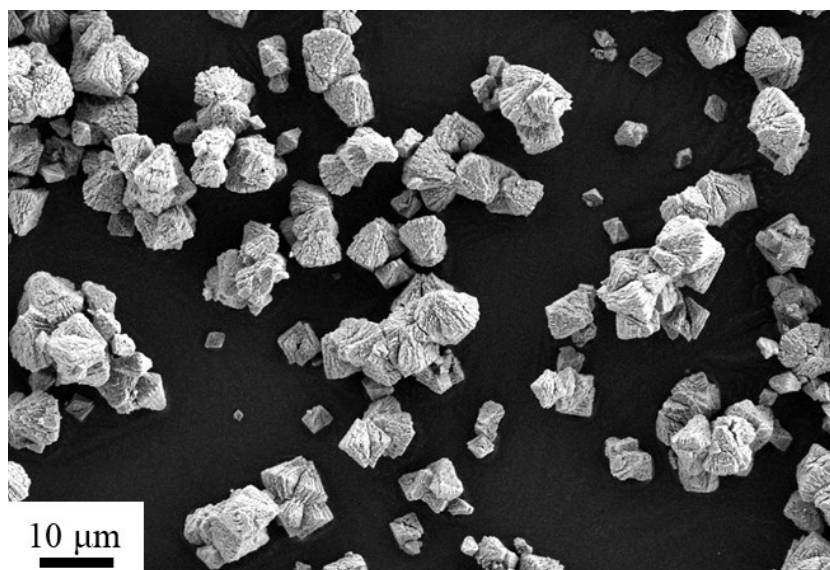

**Fig. S3** FESEM image of the cp-ZMO-500 at low magnification.

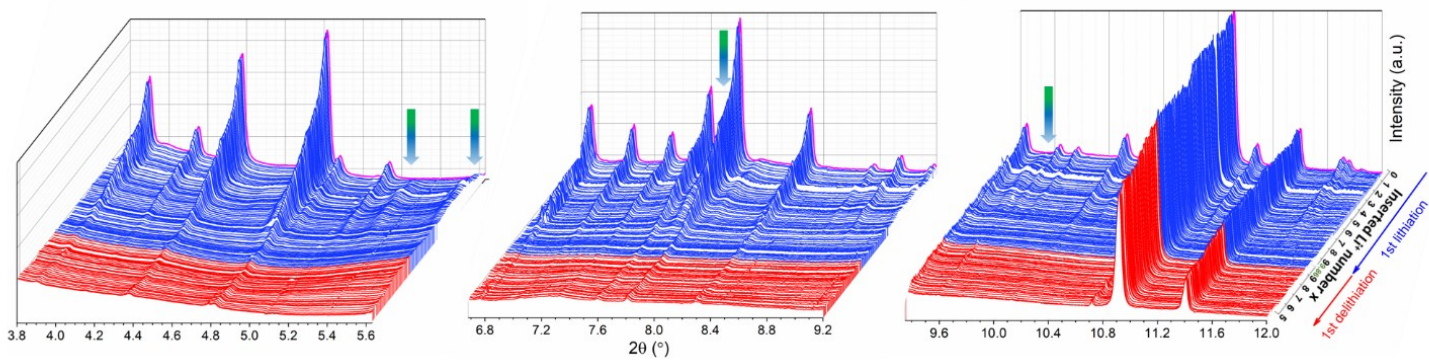

**Fig. S4** *In situ* SXR D patterns of the ZnMn<sub>2</sub>O<sub>4</sub> half-cell during the 1<sup>st</sup> cycle at a current density of 70 mA g<sup>-1</sup>, referring to the lithiation process (blue) and delithiation process (red);

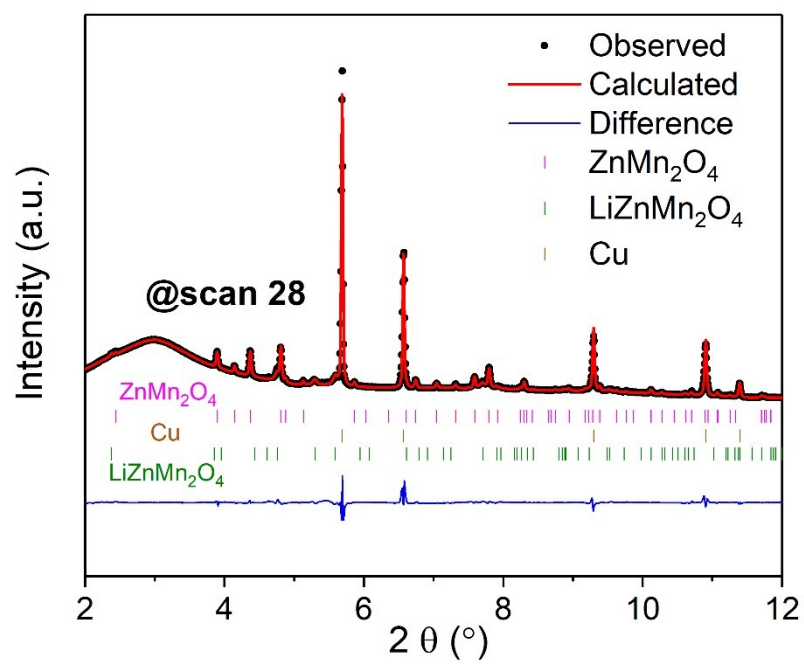

Fig. S5 *In situ* SXR D pattern of scan 28 and the Rietveld refinement result.

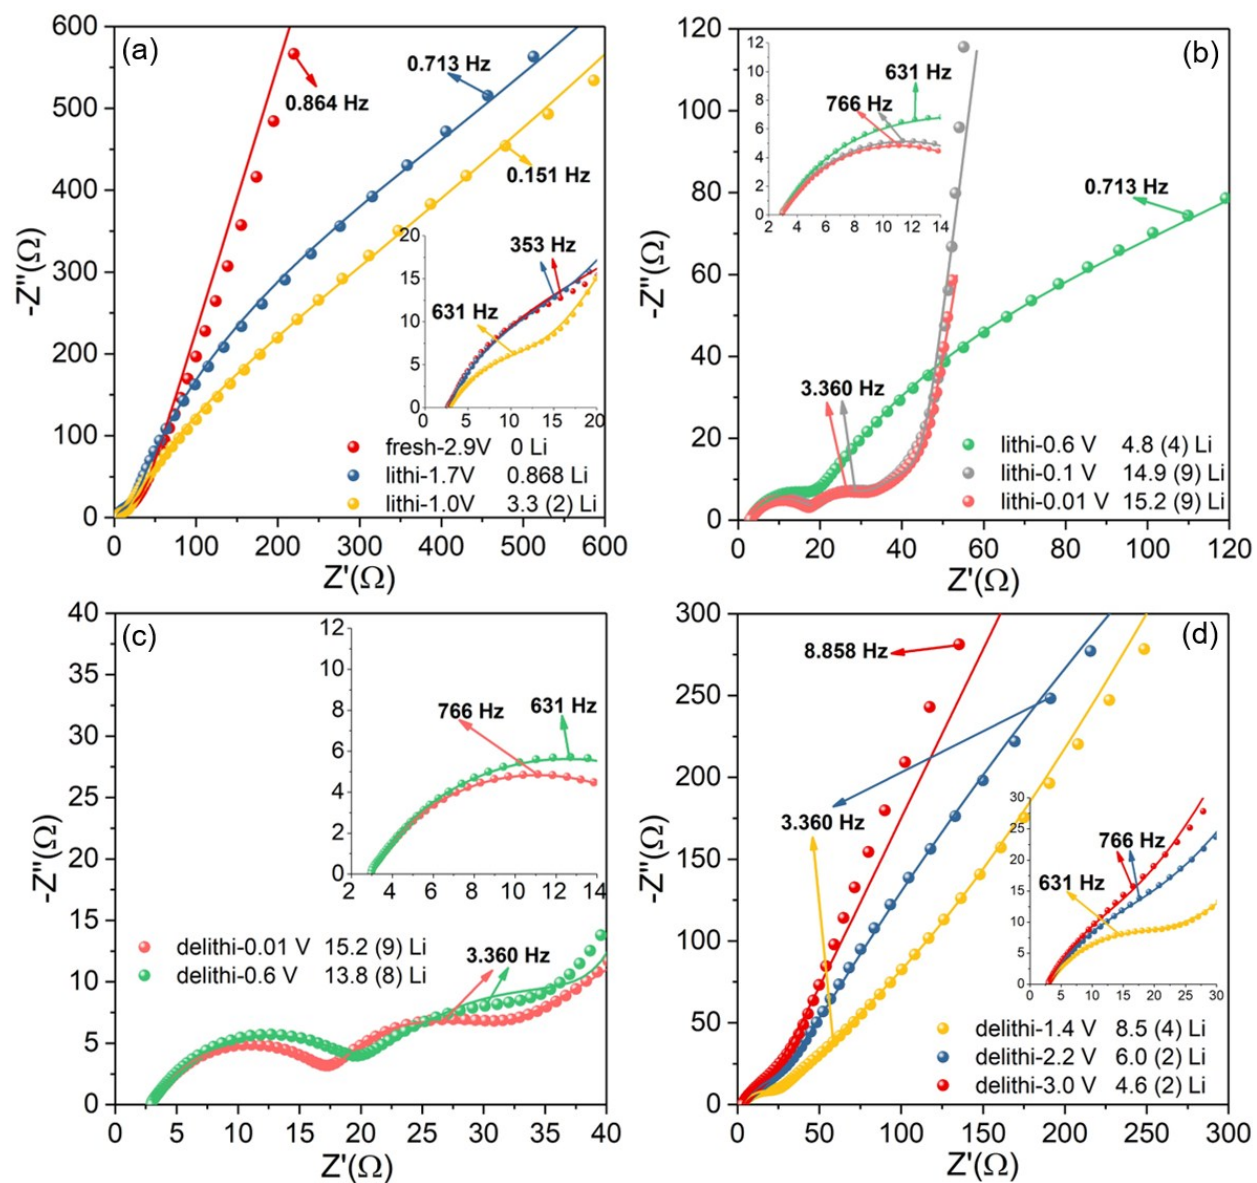

**Fig. S6** EIS Nyquist plots (points) and the fitting curves (solid line) of the 1<sup>st</sup> cycle of the ZnMn<sub>2</sub>O<sub>4</sub> half-cell.

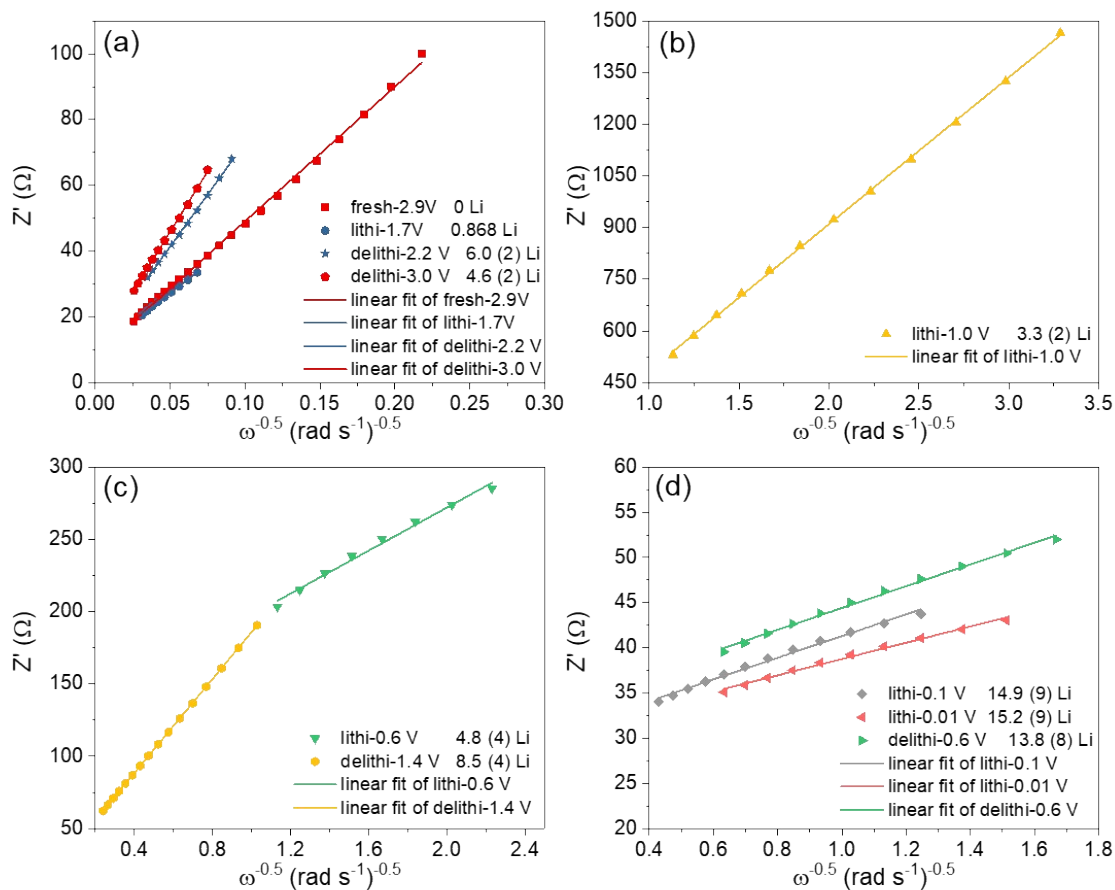

**Fig. S7** The linear relationship between the  $Z'$  and the  $\omega^{-0.5}$  according to the EIS plots scanned at different (de)lithiation states.



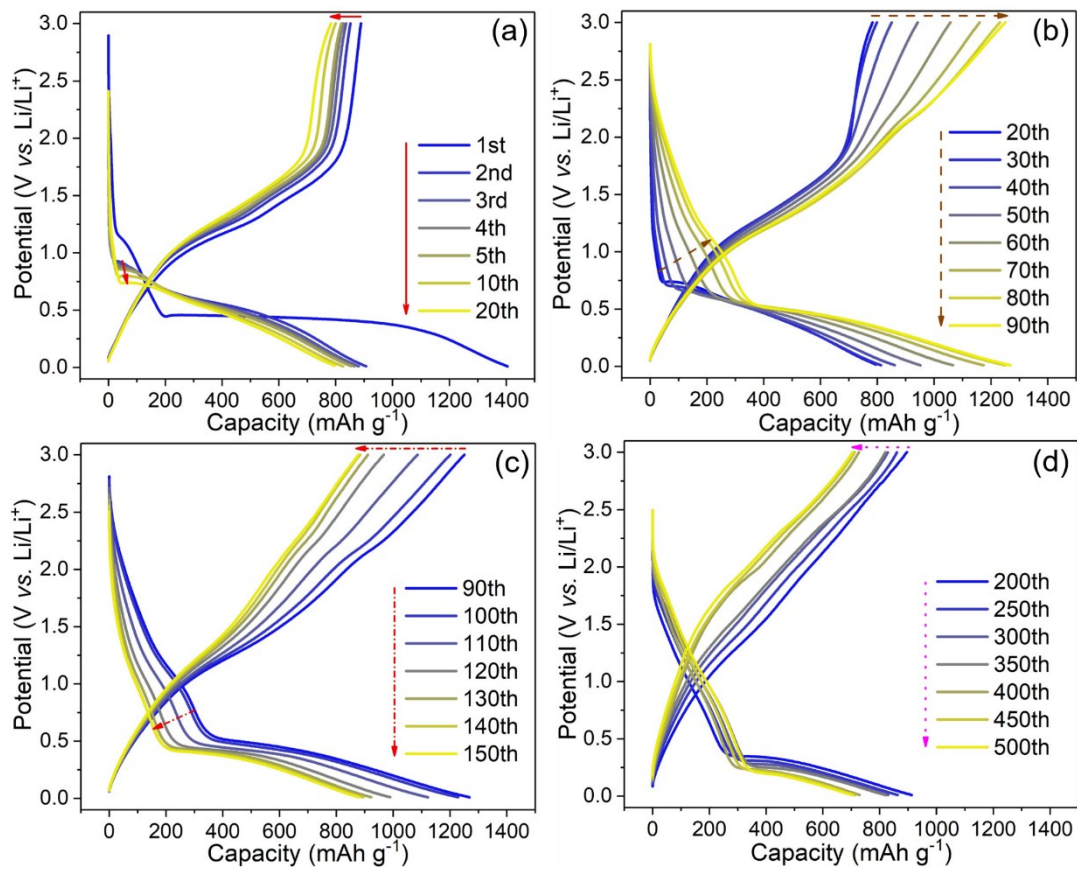

**Fig. S8** The selected potential profiles of the long-term cycling at  $0.5 \text{ A g}^{-1}$  of the  $\text{ZnMn}_2\text{O}_4$  anode.

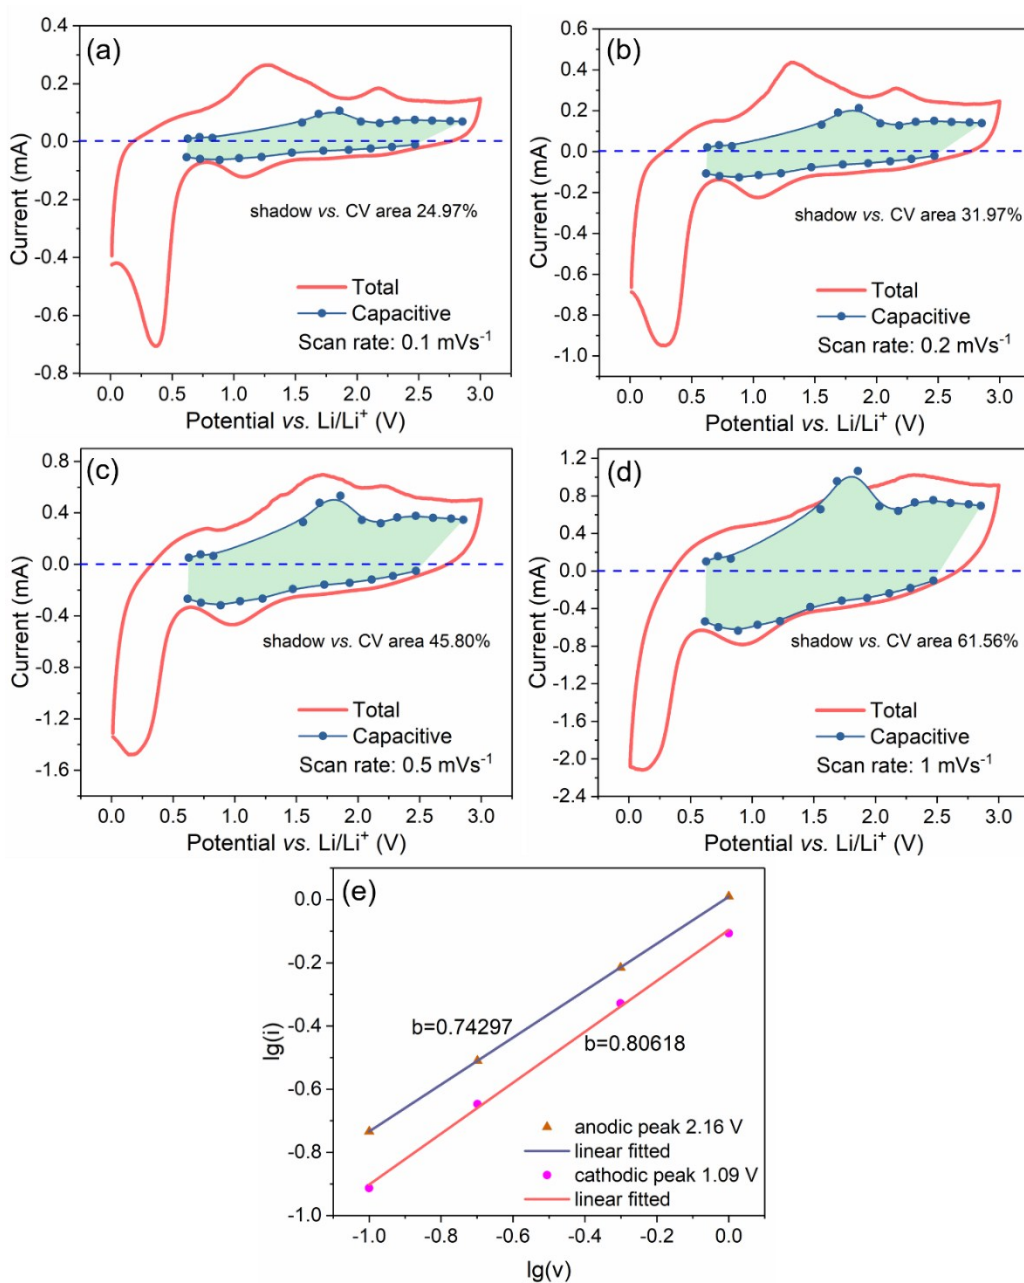

**Fig. S9** (a-d) The CV curves of the ZnMn<sub>2</sub>O<sub>4</sub> half-cell (after 55 cycles) scanned at varied rates 0.1~1 mV s<sup>-1</sup> with fitted capacitive contribution (shadow area) and (e) linear fitting of the  $\lg(i)$  vs.  $\lg(v)$  plots.
